# Supplementary material for: Efficacy of Liraglutide in Non-Diabetic Obese Adults: A Systematic Review and Meta-Analysis of Randomized Controlled Trials
Source: MDPI journal article supplement (doi:10.3390/jcm11112998), 2022-05-25

## **Efficacy and safety of liraglutide in non-diabetic obese adults: a systematic review and meta-analysis**

Joshuan J. Barboza, Mariella Huamán-Rivera, Beatriz Melgar, Carlos Diaz-Arocutipa, Adrian V. Hernandez.

### **Supplementary contents**

- **Search strategy for Pubmed, Scopus and Web of Science**
- **Supplemental Figure S1:** Risk of bias assessment of included trials
- **Supplemental Figure S2:** Subgroup analyses by length of treatment of the effects of Liraglutide vs placebo on TEAEs.
- **Supplemental Figure S3:** Subgroup analyses by doses of the effects of Liraglutide vs placebo on hypoglycemia TEAES.
- **Supplemental Figure S4:** Subgroup analyses by length of treatment of the effects of Liraglutide vs placebo on hypoglycemia episodes.
- **Supplemental Figure S5:** Subgroup analyses by doses of the effects of Liraglutide vs placebo on hypoglycemia episodes.
- **Supplemental Figure S6:** Subgroup analyses by length of treatment of the effects of Liraglutide vs placebo on body weight loss.
- **Supplemental Figure S7:** Subgroup analyses by doses of the effects of Liraglutide vs placebo on body weight loss.
- **Supplemental Figure S8:** Subgroup analyses by length of treatment of the effects of Liraglutide vs placebo on BMI.
- **Supplemental Figure S9:** Subgroup analyses by doses of the effects of Liraglutide vs placebo on BMI.
- **Supplemental Figure S10:** Subgroup analyses by length of treatment of the effects of Liraglutide vs placebo on SBP.
- **Supplemental Figure S11:** Subgroup analyses by doses of the effects of Liraglutide vs placebo on SBP.

- **Supplemental Figure S12:** Subgroup analyses by length of treatment of the effects of Liraglutide vs placebo on DBP.
- **Supplemental Figure S13:** Subgroup analyses by doses of the effects of Liraglutide vs placebo on DBP.
- **Supplemental Figure S14:** Subgroup analyses by length of treatment of the effects of Liraglutide vs placebo on Hb1Ac.
- **Supplemental Figure S15:** Subgroup analyses by doses of the effects of Liraglutide vs placebo on Hb1Ac.
- **Supplemental Figure S16:** Sensitivity analyses of the effects of Liraglutide vs placebo on body weight loss.
- **Supplemental Figure S17:** Sensitivity analyses of the effects of Liraglutide vs placebo on BMI.
- **Supplemental Table S1:** GRADE summary of findings table
- **Supplemental Figure S18:** Publication bias

- **Search strategy for Pubmed, Scopus and Web of Science**

## **PUBMED**

1. (Liraglutide OR Victoza OR Saxenda OR “NN 2211” OR “2211, NN” OR “NN2211” OR “NN-2211”)
2. (Obesity OR “Abdominal Obesities” OR “Obesities, Abdominal” OR “Abdominal Obesity” OR “Central Obesity” OR “Central Obesities” OR “Obesities, Central” OR “Obesity, Central” OR “Obesity, Visceral” OR “Visceral Obesity” OR “Obesities, Visceral” OR “Visceral Obesities”)
3. #1 AND #2

## **SCOPUS**

1. TITLE-ABS-KEY(Liraglutide OR Victoza OR Saxenda OR “NN 2211” OR “NN2211” OR “NN-2211”)
2. TITLE-ABS-KEY(Obesity OR “Abdominal Obesities” OR “Abdominal Obesity” OR “Central Obesity” OR “Central Obesities” OR “Visceral Obesity” OR “Visceral Obesities”)
3. #1 AND #2

## **WOS**

1. TS=(Liraglutide OR Victoza OR Saxenda OR “NN 2211” OR “2211, NN” OR “NN2211” OR “NN-2211”)
2. TS=(Obesity OR “Abdominal Obesities” OR “Obesities, Abdominal” OR “Abdominal Obesity” OR “Central Obesity” OR “Central Obesities” OR “Obesities, Central” OR “Obesity, Central” OR “Obesity, Visceral” OR “Visceral Obesity” OR “Obesities, Visceral” OR “Visceral Obesities”)
3. #1 AND #2

**Supplemental Figure S1:** Risk of bias assessment of included trials

| Study ID       | Experimental | Comparator | Outcome               | Randomization process | Deviations from intended interventions | Missing outcome data | Measurement of the outcome | Selection of the reported result | Overall |   |
|----------------|--------------|------------|-----------------------|-----------------------|----------------------------------------|----------------------|----------------------------|----------------------------------|---------|---|
| Blackman 2016  | liraglutide  | placebo    | Body weight reduction | +                     | +                                      | ?                    | +                          | +                                | !       | + |
| Halawi 2017    | Liraglutide  | placebo    | Body weight reduction | +                     | +                                      | +                    | N                          | +                                | +       | + |
| Kim 2013       | Liraglutide  | placebo    | Body weight reduction | N                     | N                                      | N                    | +                          | ?                                | N       | N |
| Larsen 2017    | Liraglutide  | placebo    | Body weight reduction | ?                     | +                                      | +                    | +                          | +                                | !       | + |
| Wadden 2013    | Liraglutide  | Placebo    | Body weight reduction | +                     | ?                                      | N                    | +                          | +                                | N       | N |
| Le roux 2017   | Liraglutide  | Placebo    | Body weight reduction | ?                     | ?                                      | +                    | +                          | +                                | !       | + |
| Lean 2014      | Liraglutide  | Placebo    | Body weight reduction | ?                     | N                                      | +                    | +                          | +                                | N       | N |
| Pi-sunyer 2015 | Liraglutide  | placebo    | Body weight reduction | +                     | N                                      | +                    | +                          | +                                | !       | + |
| Svensson 2018  | Liraglutide  | placebo    | Body weight reduction | ?                     | ?                                      | +                    | +                          | +                                | N       | N |
| Astrup 2012    | Liraglutide  | placebo    | Body weight reduction | ?                     | +                                      | N                    | +                          | +                                | N       | N |
| O'Neil 2018    | Liraglutide  | placebo    | Body weight reduction | ?                     | +                                      | N                    | +                          | +                                | N       | N |
| Saxena 2021    | Liraglutide  | placebo    | Body weight reduction | ?                     | +                                      | N                    | +                          | +                                | N       | N |

+

 Low risk

?

 Some concerns

N

 High risk

**Supplemental Figure S2:** Subgroup analyses by length of treatment of the effects of Liraglutide vs placebo on TEAEs.

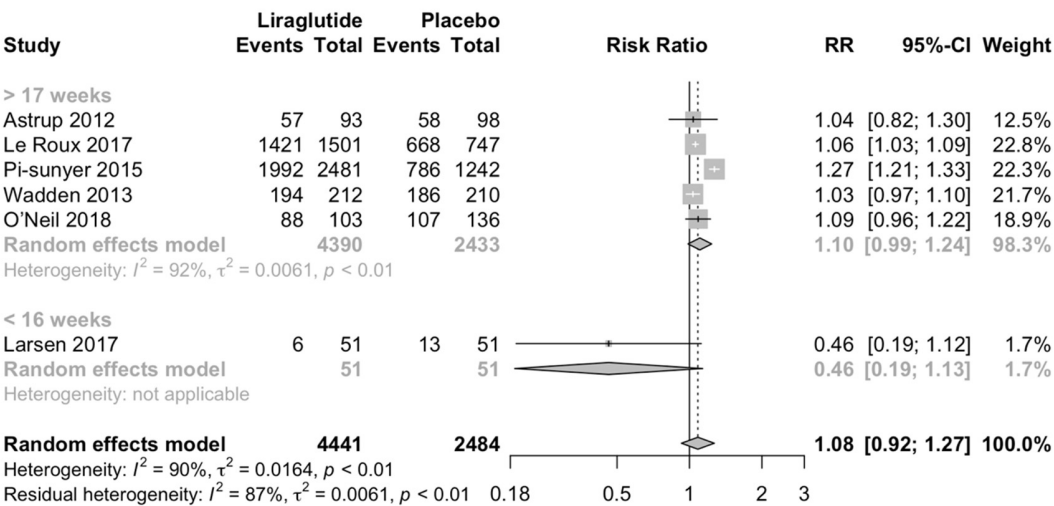

**Supplemental Figure S3:** Subgroup analyses by doses of the effects of Liraglutide vs placebo on hypoglycemia TEAES.

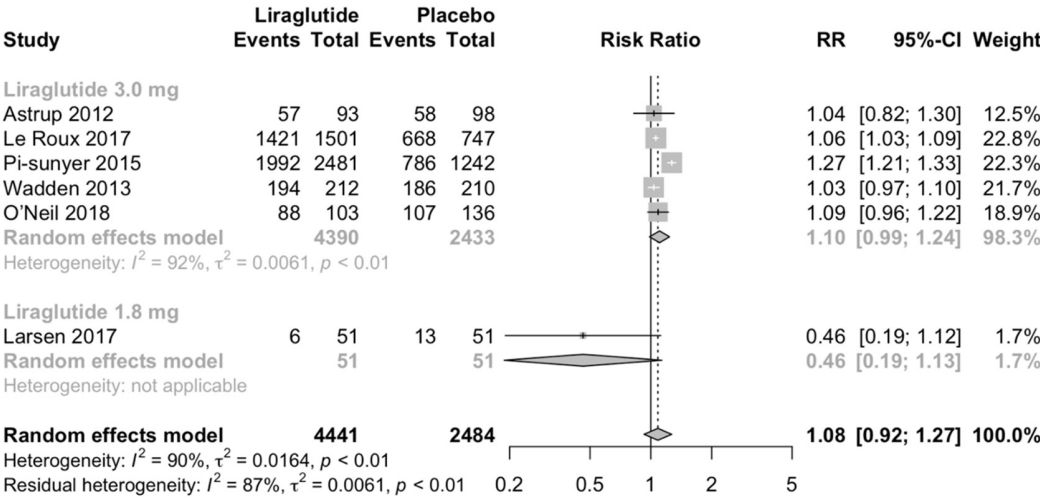

**Supplemental Figure S4:** Subgroup analyses by weeks of the effects of Liraglutide vs placebo on hypoglycemia episodes.

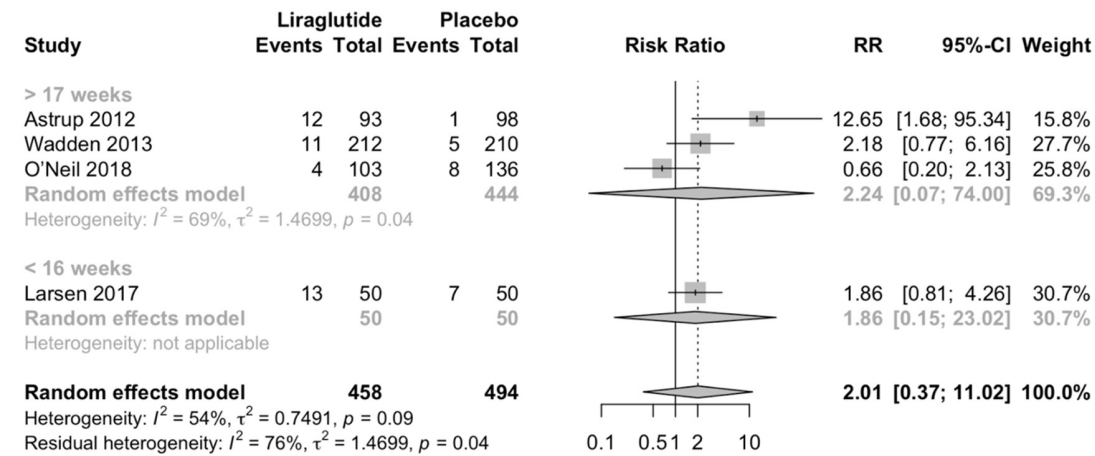

**Supplemental Figure S5:** Subgroup analyses by doses of the effects of Liraglutide vs placebo on hypoglycemia episodes.

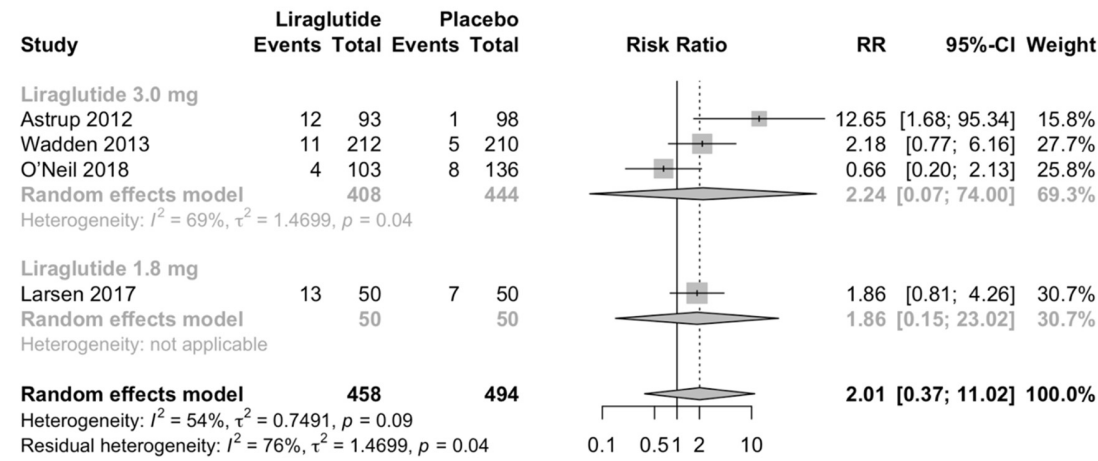



**Supplemental Figure S6:** Subgroup analyses by weeks of the effects of Liraglutide vs placebo on body weight loss.

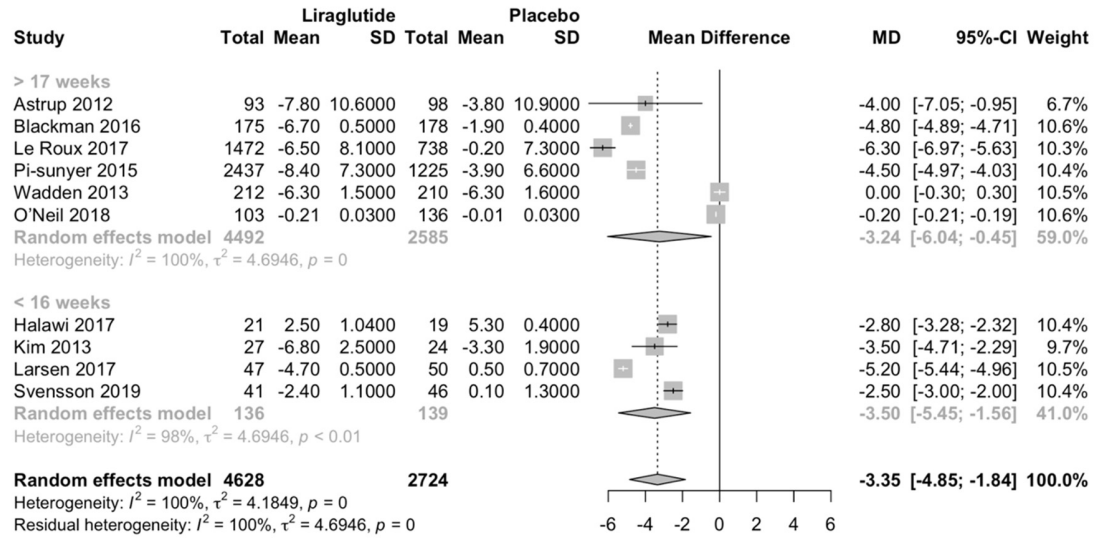

**Supplemental Figure S7:** Subgroup analyses by doses of the effects of Liraglutide vs placebo on body weight loss.

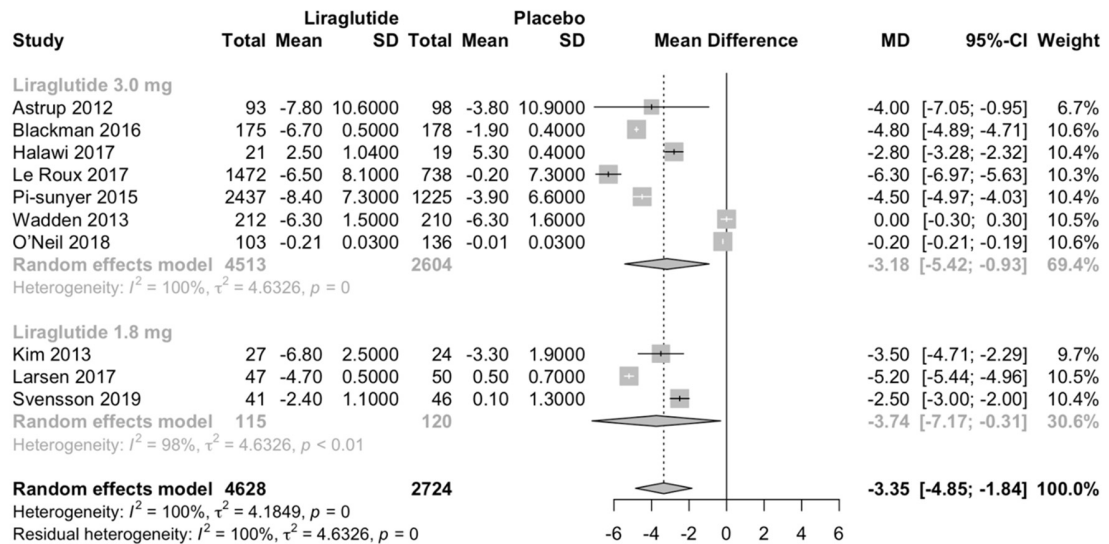

**Supplemental Figure S8:** Subgroup analyses by weeks of the effects of Liraglutide vs placebo on BMI.

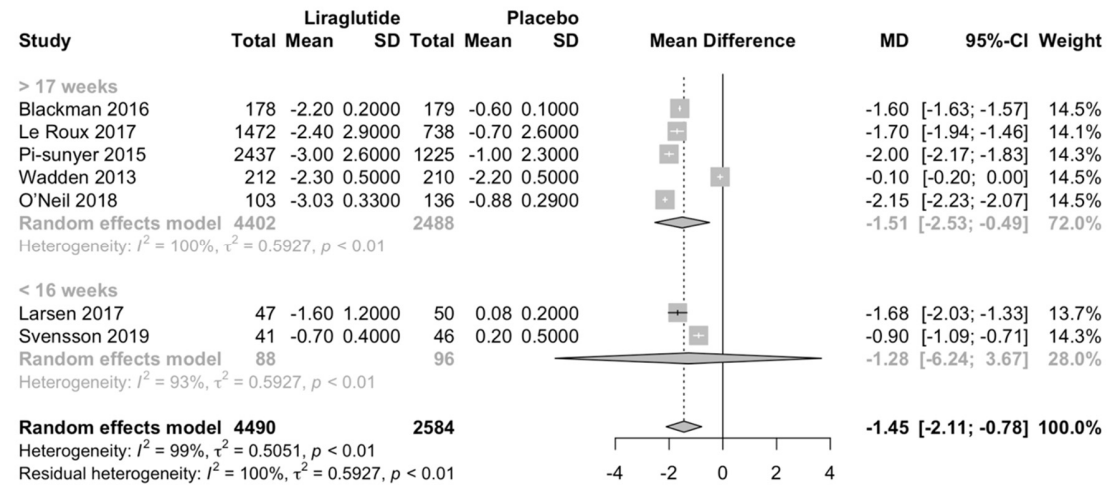

**Supplemental Figure S9:** Subgroup analyses by doses of the effects of Liraglutide vs placebo on BMI.

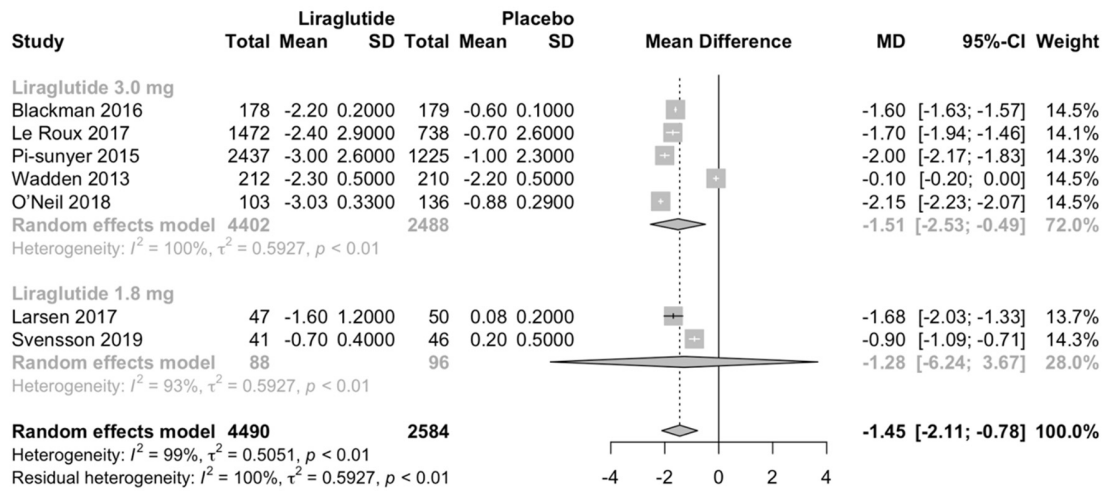

**Supplemental Figure S10: Subgroup analyses by weeks of the effects of Liraglutide vs placebo on SBP.**

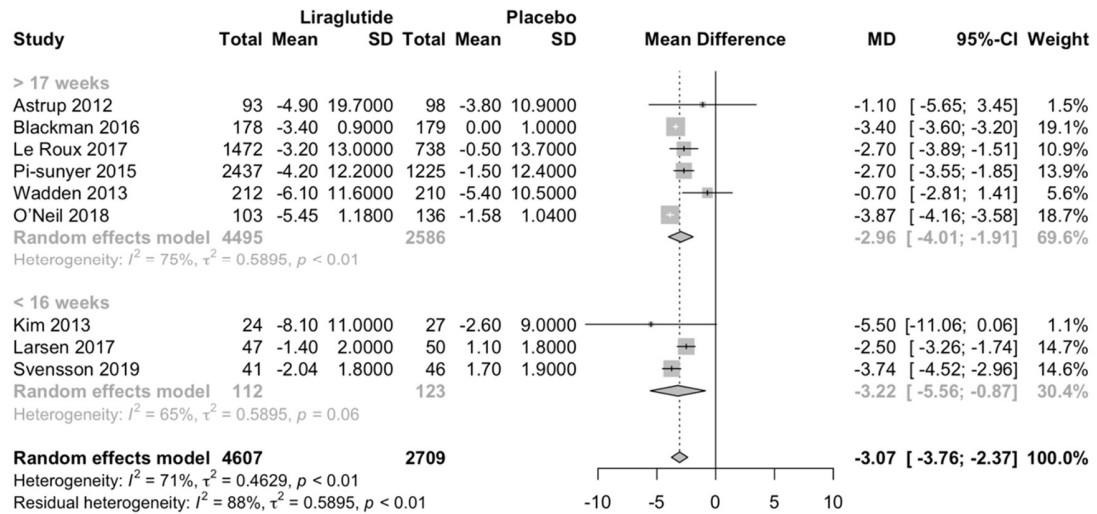

**Supplemental Figure S11: Subgroup analyses by doses of the effects of Liraglutide vs placebo on SBP.**

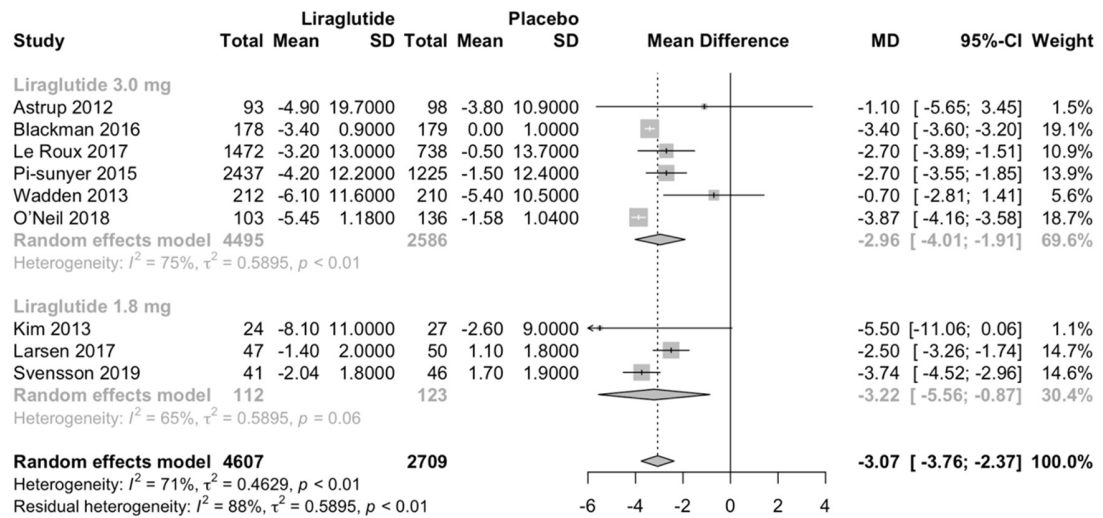

**Supplemental Figure S12: Subgroup analyses by weeks of the effects of Liraglutide vs placebo on DBP.**

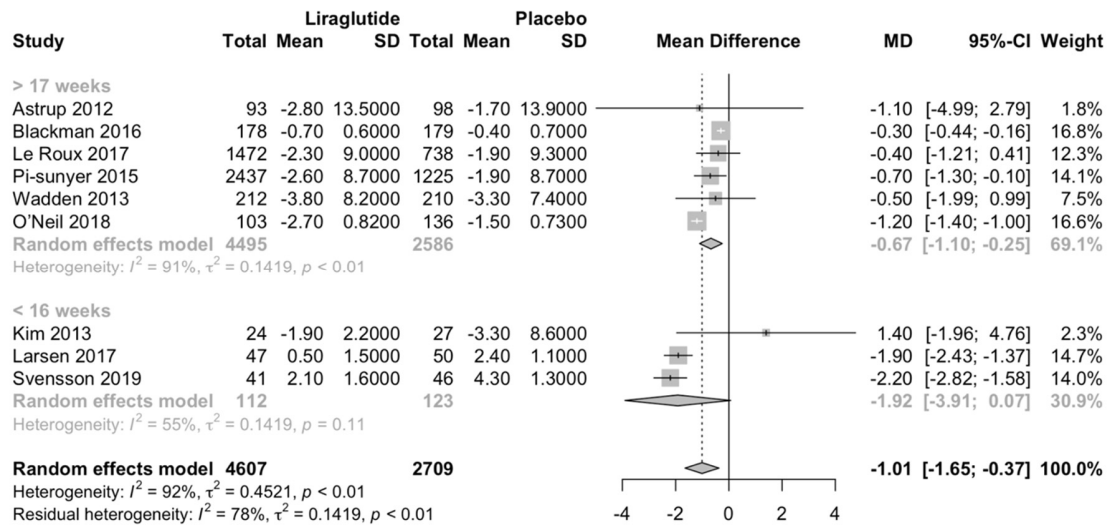

**Supplemental Figure S13:** Subgroup analyses by doses of the effects of Liraglutide vs placebo on DBP.

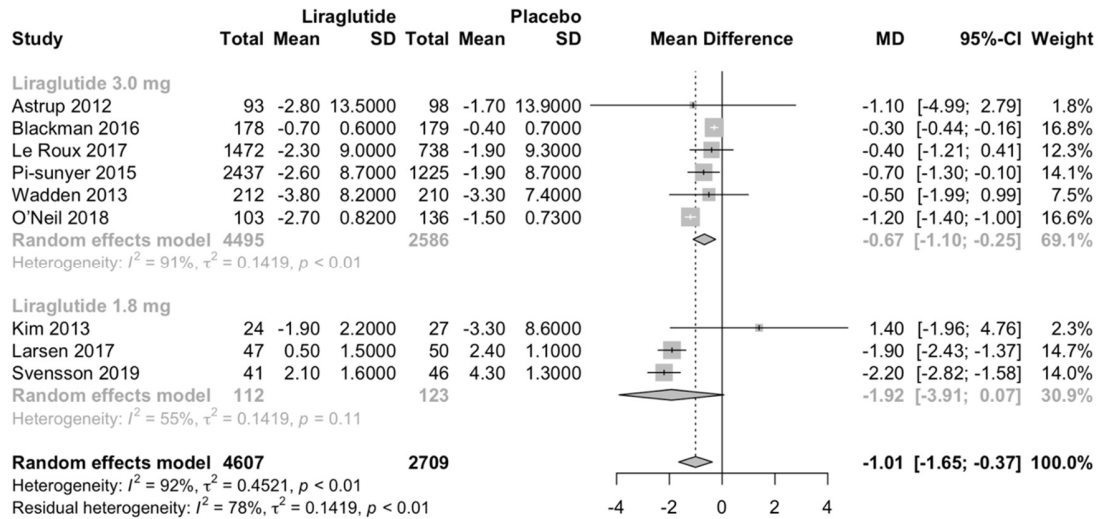



**Supplemental Figure S14:** Subgroup analyses by weeks of the effects of Liraglutide vs placebo on Hb1Ac.

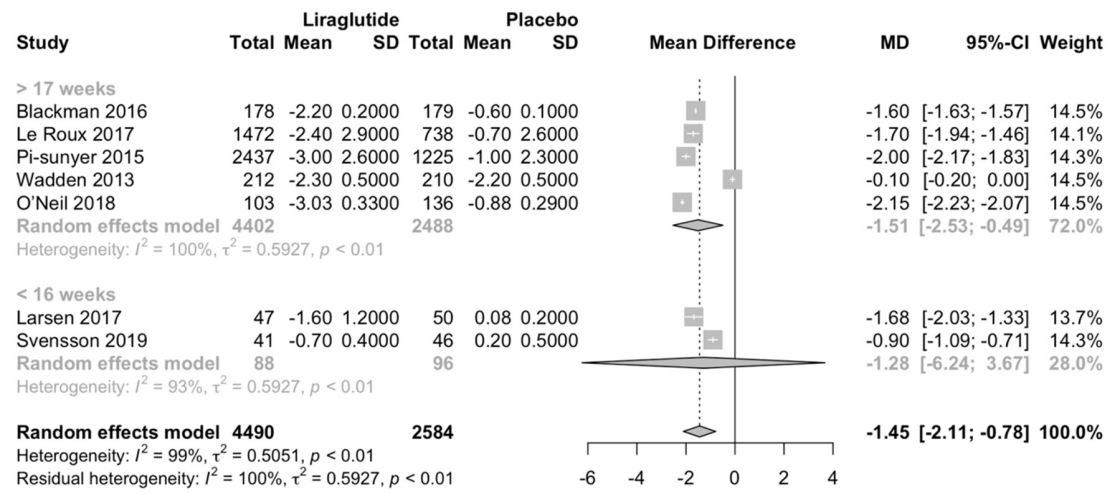

**Supplemental Figure S15:** Subgroup analyses by doses of the effects of Liraglutide vs placebo on Hb1Ac.

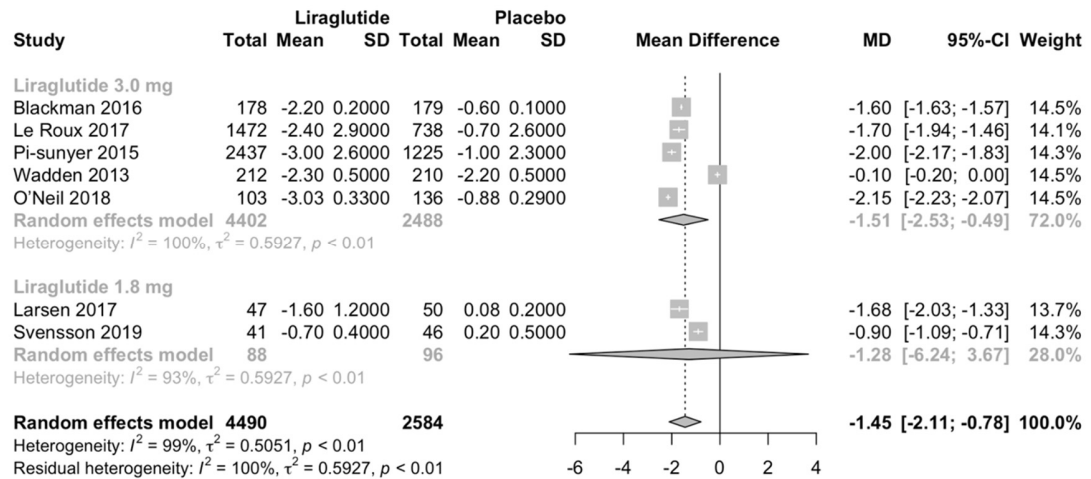

**Supplemental Figure S16:** Sensitivity analyses of the effects of Liraglutide vs placebo on body weight loss.

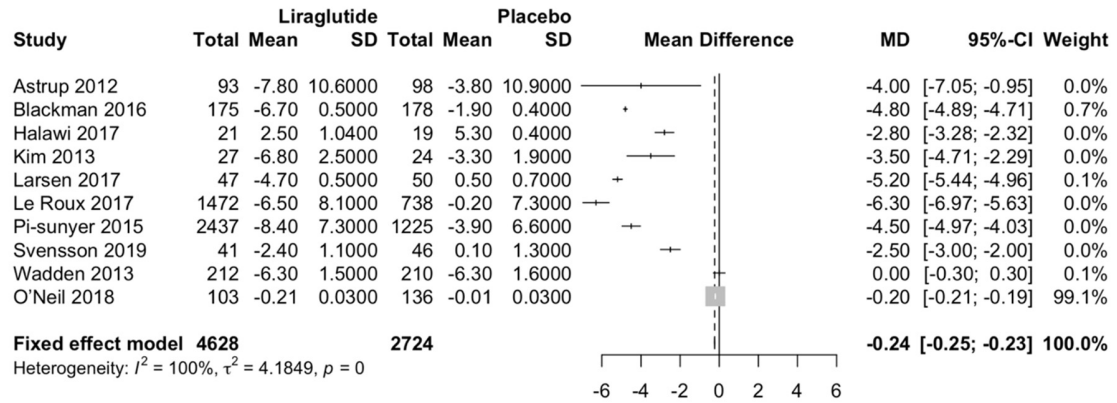

**Supplemental Figure S17:** Sensitivity analyses of the effects of Liraglutide vs placebo on BMI.

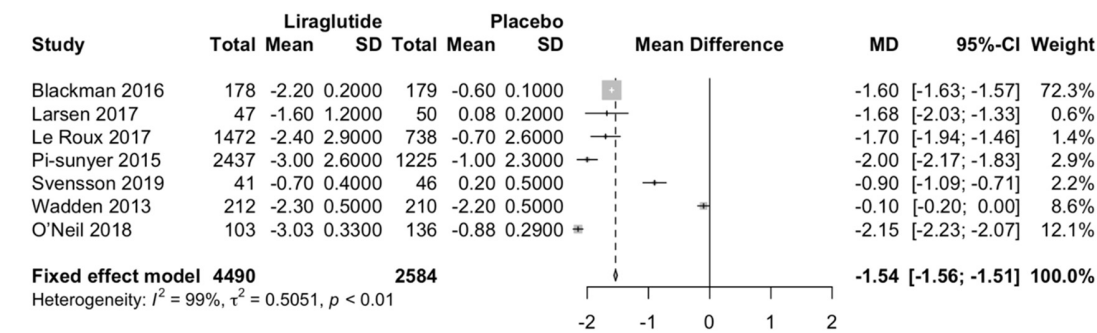

**Supplemental Table S1: GRADE Summary of findings of the effect of liraglutide vs. placebo in non-diabetic obese patients**

| <b>Liraglutide compared to Placebo for body weight loss</b>                                                                         |                                       |                                   |                                   |                                                |                                                          |
|-------------------------------------------------------------------------------------------------------------------------------------|---------------------------------------|-----------------------------------|-----------------------------------|------------------------------------------------|----------------------------------------------------------|
| <b>Patient or population:</b> body weight loss<br><b>Setting:</b><br><b>Intervention:</b> Liraglutide<br><b>Comparison:</b> Placebo |                                       |                                   |                                   |                                                |                                                          |
| Outcomes                                                                                                                            | № of participants (studies) Follow-up | Certainty of the evidence (GRADE) | Relative effect (95% CI)          | Anticipated absolute effects                   |                                                          |
|                                                                                                                                     |                                       |                                   |                                   | Risk with Placebo                              | Risk difference with Liraglutide                         |
| TEAEs follow-up: mean 47.2 weeks                                                                                                    | 6925 (6 RCTs)                         | ⊕○○○<br>Very low <sup>a,b,c</sup> | <b>RR 1.08</b><br>(0.92 to 1.27)  | 732 per 1,000                                  | <b>59 more per 1,000</b><br>(59 fewer to 198 more)       |
| Hypoglycemic episodes follow-up: mean 41.3 weeks                                                                                    | 952 (4 RCTs)                          | ⊕○○○<br>Very low <sup>a,d,e</sup> | <b>RR 2.01</b><br>(0.37 to 11.02) | 43 per 1,000                                   | <b>43 more per 1,000</b><br>(27 fewer to 426 more)       |
| Body weight follow-up: mean 34.9 weeks                                                                                              | 7352 (10 RCTs)                        | ⊕○○○<br>Very low <sup>a,f,g</sup> | -                                 | The mean body weight was <b>-1.5 kg</b>        | <b>MD 3.35 kg lower</b><br>(4.65 lower to 2.05 lower)    |
| Body mass index (BMI) follow-up: mean 38.7 weeks                                                                                    | 7074 (7 RCTs)                         | ⊕○○○<br>Very low <sup>a,f,h</sup> | -                                 | The mean body mass index was <b>-0.7 kg/m2</b> | <b>MD 1.45 kg/m2 lower</b><br>(1.98 lower to 0.91 lower) |

## Liraglutide compared to Placebo for body weight loss

**Patient or population:** body weight loss

**Setting:**

**Intervention:** Liraglutide

**Comparison:** Placebo

| Outcomes                                                         | № of participants (studies) Follow-up | Certainty of the evidence (GRADE) | Relative effect (95% CI) | Anticipated absolute effects                           |                                                      |
|------------------------------------------------------------------|---------------------------------------|-----------------------------------|--------------------------|--------------------------------------------------------|------------------------------------------------------|
|                                                                  |                                       |                                   |                          | Risk with Placebo                                      | Risk difference with Liraglutide                     |
| Systolic blood pressure (SBP) follow-up: mean 37.7 weeks         | 7316 (9 RCTs)                         | ⊕⊕○○ Low <sup>a,h,i</sup>         | -                        | The mean systolic blood pressure was <b>-1.37</b> mmHg | MD <b>3.07 mmHg lower</b> (3.66 lower to 2.48 lower) |
| Diastolic blood pressure (DBP) follow-up: mean 37.7 weeks        | 7316 (9 RCTs)                         | ⊕○○○ Very low <sup>a,h,j</sup>    | -                        | The mean diastolic blood pressure was <b>-0.7</b> mmHg | MD <b>1.01 mmHg lower</b> (1.55 lower to 0.47 lower) |
| Hb1Ac (Hb1Ac) follow-up: mean 38 weeks                           | 7253 (8 RCTs)                         | ⊕○○○ Very low <sup>a,k,l</sup>    | -                        | The mean hb1Ac was <b>0.8</b> %                        | MD <b>0.76 % lower</b> (2.24 lower to 0.72 higher)   |
| Bilirrubina total (BT) assessed with: MD follow-up: mean 15 days | 230 (8 observational studies)         | ⊕○○○ Very low <sup>a,b</sup>      | -                        | The mean bilirrubina total was <b>10</b> mg/dl         | MD <b>2 mg/dl lower</b> (4 lower to 1 lower)         |

\***The risk in the intervention group** (and its 95% confidence interval) is based on the assumed risk in the comparison group and the **relative effect** of the intervention (and its 95% CI).

**CI:** confidence interval; **MD:** mean difference; **RR:** risk ratio

---

## Liraglutide compared to Placebo for body weight loss

---

**Patient or population:** body weight loss

**Setting:**

**Intervention:** Liraglutide

**Comparison:** Placebo

| Outcomes | № of participants (studies)<br>Follow-up | Certainty of the evidence (GRADE) | Relative effect (95% CI) | Anticipated absolute effects |                                  |
|----------|------------------------------------------|-----------------------------------|--------------------------|------------------------------|----------------------------------|
|          |                                          |                                   |                          | Risk with Placebo            | Risk difference with Liraglutide |

### GRADE Working Group grades of evidence

**High certainty:** we are very confident that the true effect lies close to that of the estimate of the effect.

**Moderate certainty:** we are moderately confident in the effect estimate: the true effect is likely to be close to the estimate of the effect, but there is a possibility that it is substantially different.

**Low certainty:** our confidence in the effect estimate is limited: the true effect may be substantially different from the estimate of the effect.

**Very low certainty:** we have very little confidence in the effect estimate: the true effect is likely to be substantially different from the estimate of effect.

---

### Explanations

- a. There is a high risk of bias in at least one of the studies for this outcome.
- b. High heterogeneity. I<sup>2</sup>: 90%
- c. Not significant effect RR 1.08 and 95%CI 0.92-1.27
- d. Moderate heterogeneity. I<sup>2</sup>: 54%
- e. No significant effect RR 2.01 95%CI 0.37 - 11.02
- f. High heterogeneity. I<sup>2</sup>: 99%
- g. Significant effect MD -3.35 and moderate range 95%CI -4.65 to -2.05
- h. Significant effect and moderate range of 95%CI
- i. Moderate heterogeneity. I<sup>2</sup>: 71%
- j. High heterogeneity. I<sup>2</sup>: 92%
- k. High heterogeneity. I<sup>2</sup>: 100%
- l. No significant effect and wide range of 95%CI

**Supplemental Figure S18:** Publication bias

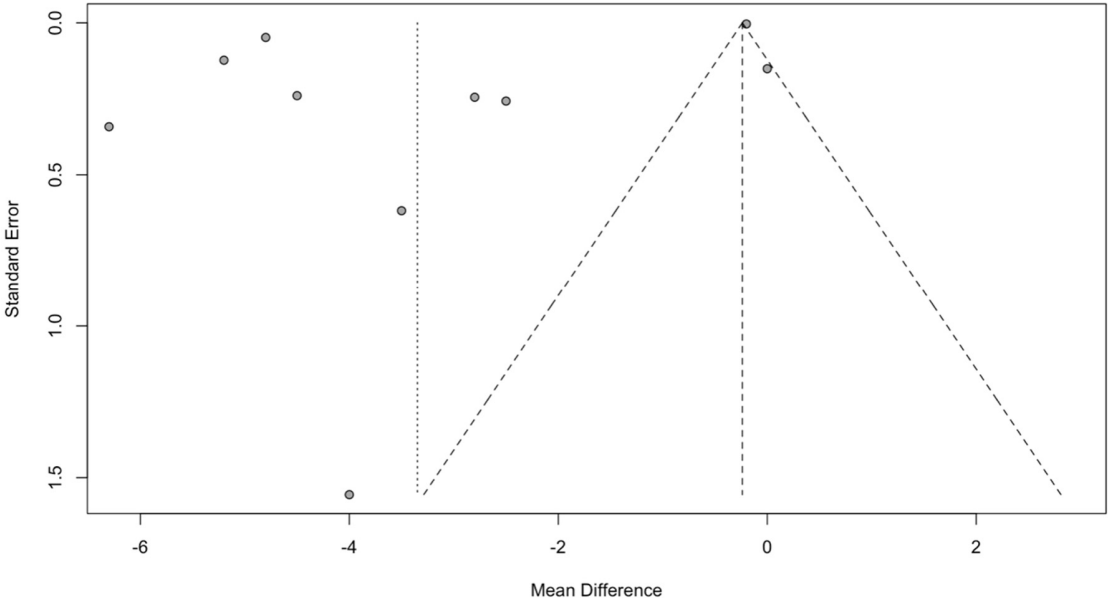

Supplement: s1 [file s1]
